# Supplementary material for: Mapping axon initial segment structure and function by multiplexed proximity biotinylation
Source: PubMed Central journal article supplement (PMC6941957; doi:10.1038/s41467-019-13658-5), 2020-01-03
Supplement: 41467_2019_13658_MOESM1_ESM.pdf [file 41467_2019_13658_MOESM1_ESM.pdf]

1 **Supplementary Information:**  
2 **Mapping Axon Initial Segment Structure and Function by Multiplexed Proximity Biotinylation**  
3 **by Hamdan et al.**  
4  
5 Supplementary information includes:  
6 Supplementary Figures 1-6  
7 Supplementary Methods  
8

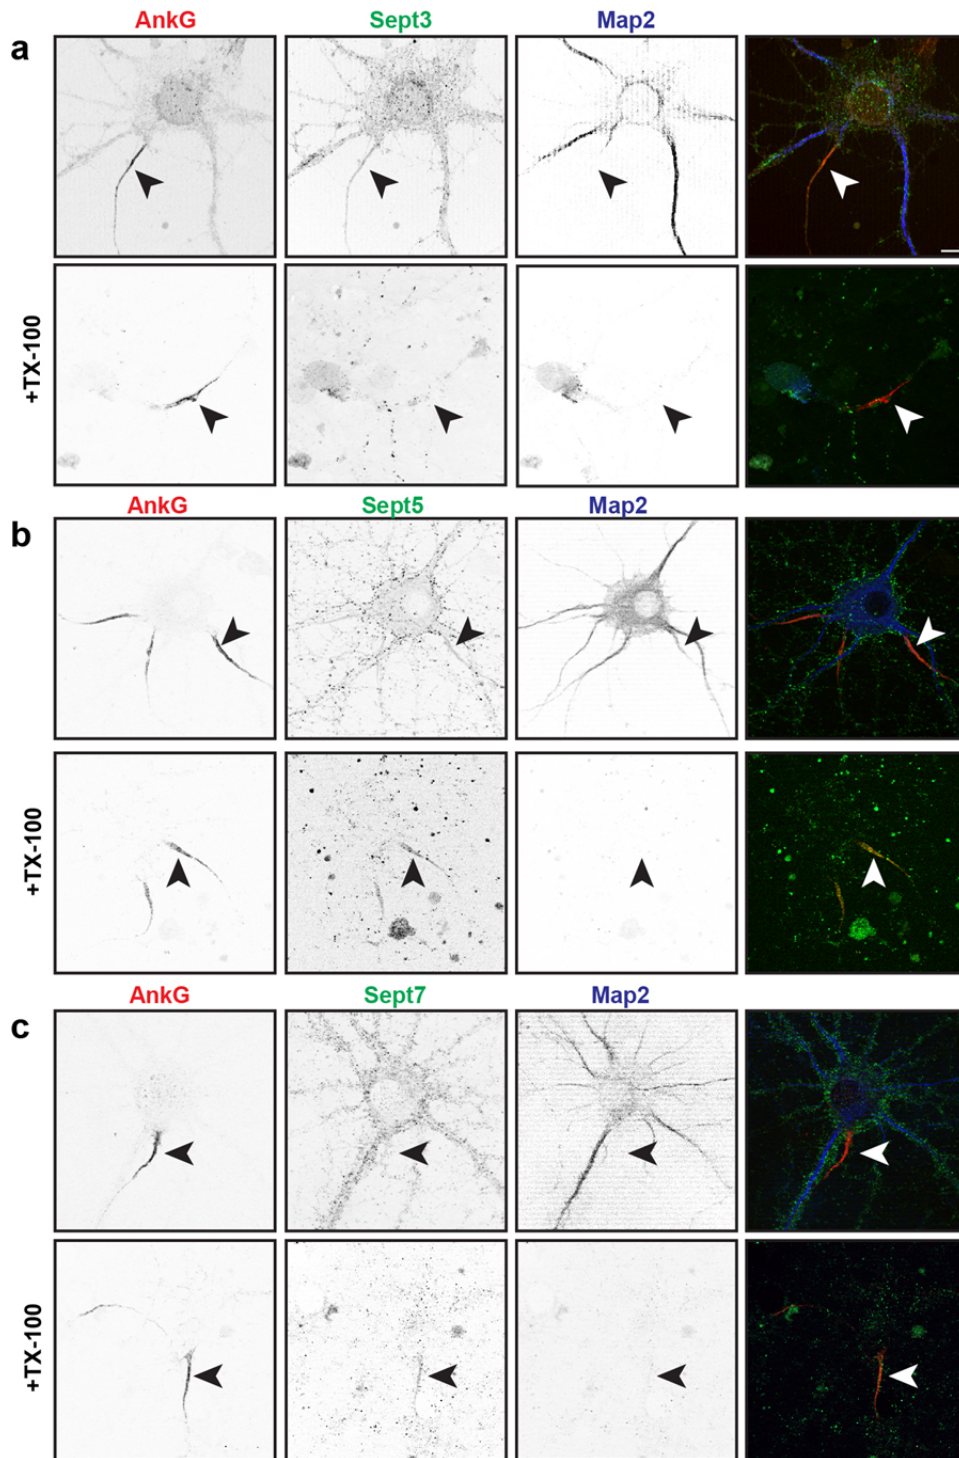

9  
10  
11  
12  
13

**Supplementary Figure 1. A detergent insoluble pool of Septins is located at the AIS.** (a-c) Immunostaining of DIV14 hippocampal neurons using antibodies against AnkG (red), Sept3 (a, green), Sept5 (b, green), Sept7 (c, green) and Map2 (blue). The lower panels show the Triton X-

14 100 detergent resistant pools of Sept5 (b) and Sept7 (c) at the AIS. AIS are indicated by  
15 arrowheads. Scale bar = 5  $\mu$ m.

16

17

18

19

20

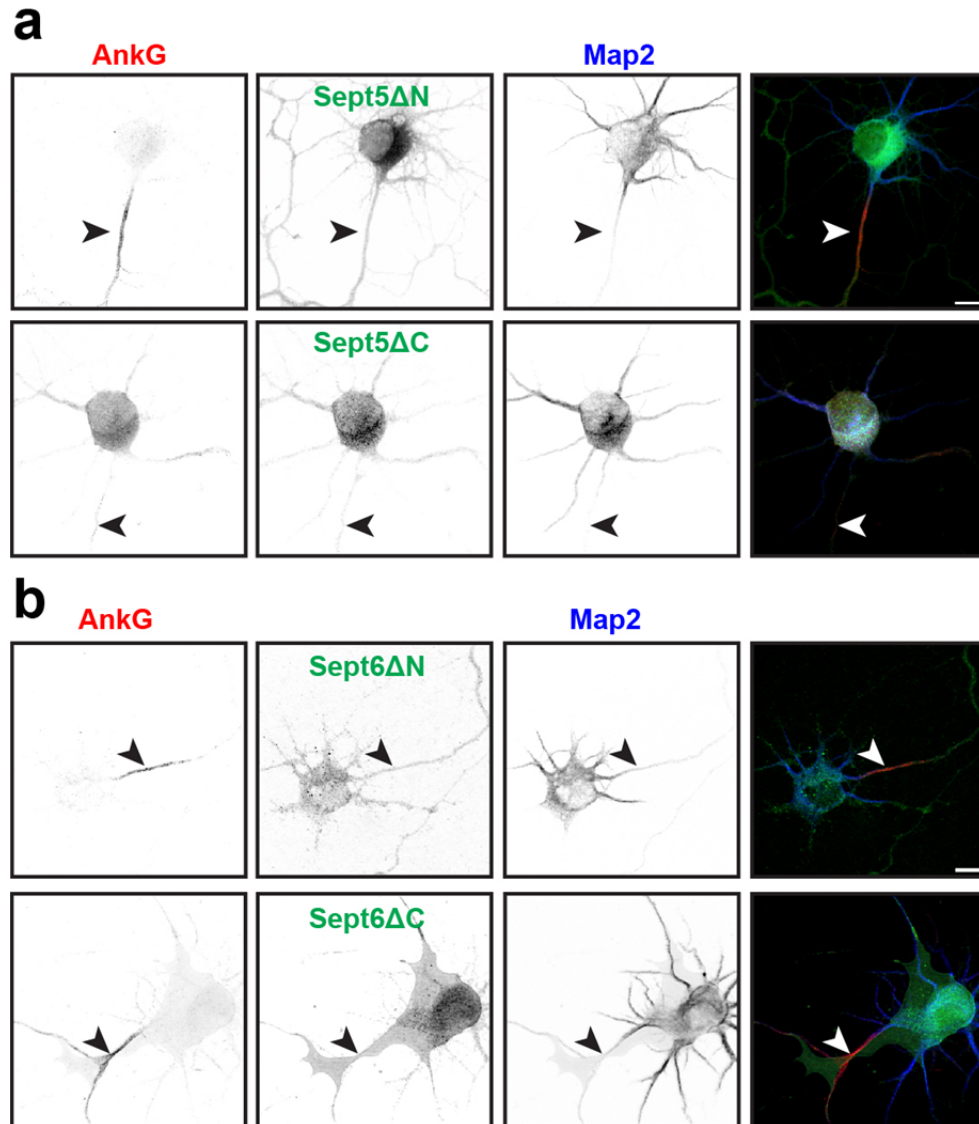

21

22

23

24

25

26

27

28

29

30

**Supplementary Figure 2. The N-terminus of Sept5 binds to AnkG.** (a) Immunostaining of neurons transfected using plasmids for Sept5ΔN (top) or Sept5ΔC (bottom) using antibodies against AnkG (red), Myc-tag (green), and Map2 (blue). AIS are indicated by arrowheads. Scalebar = 5 μm. (b) Immunostaining of neurons transfected using plasmids for Sept6ΔN (top) or Sept6ΔC (bottom) using antibodies against AnkG (red), Myc-tag (green), and Map2 (blue). AIS are indicated by arrowheads. Scalebar = 5 μm.

a

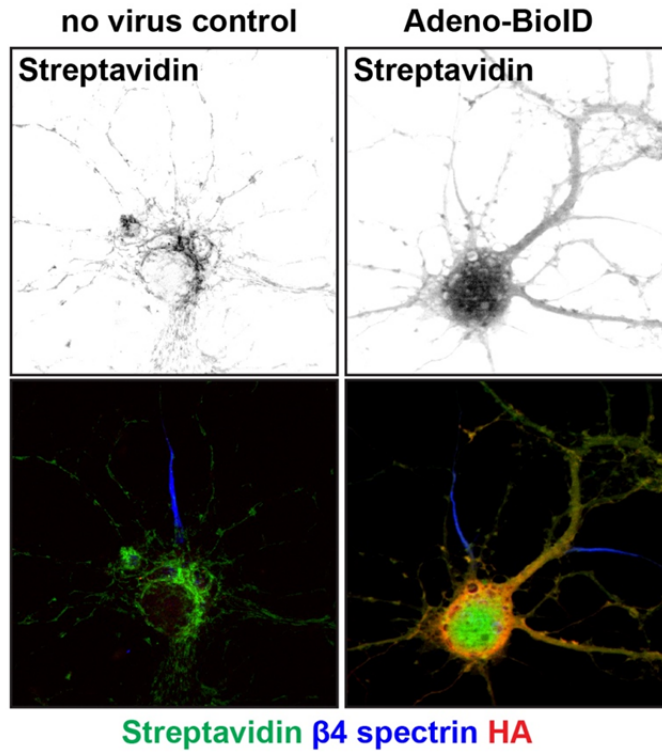

b

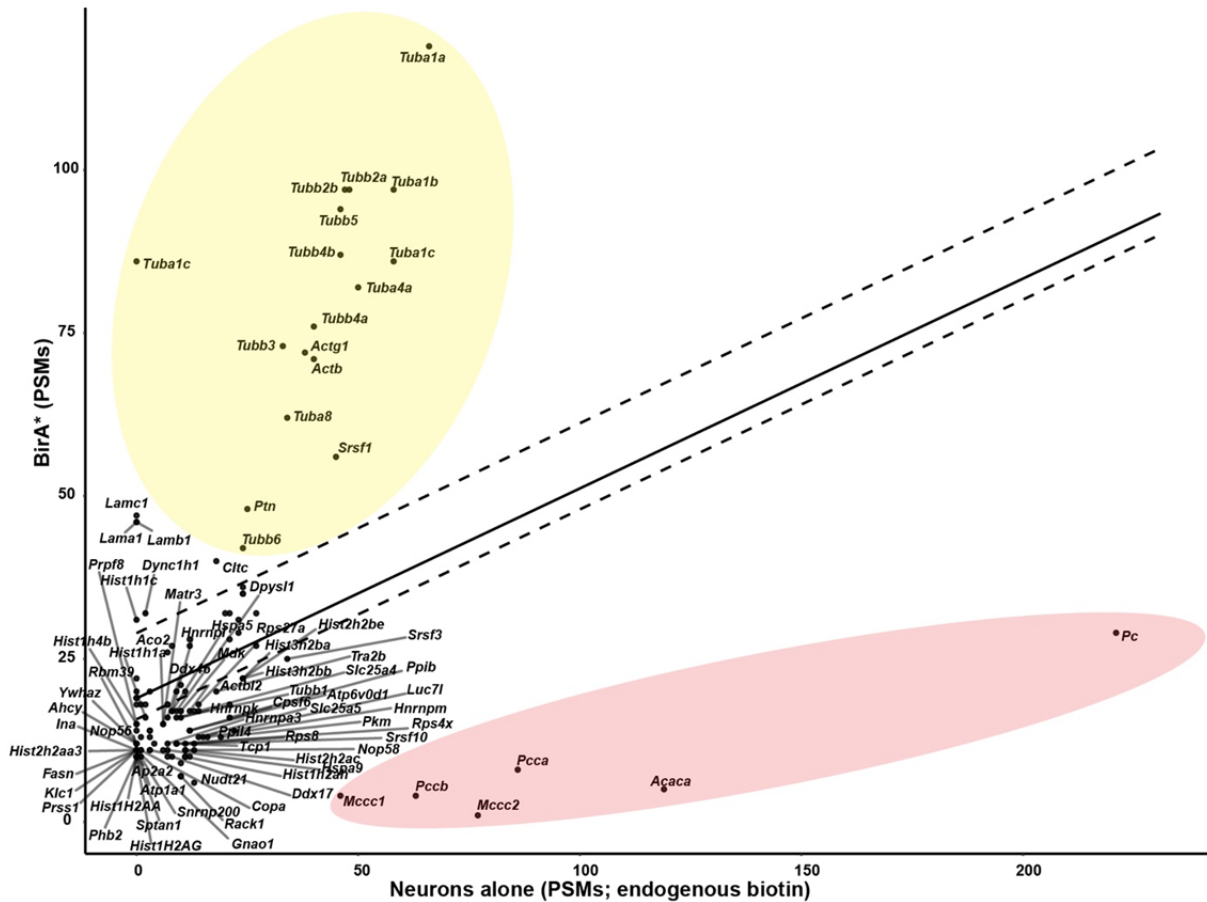

31 Supplementary Figure 3. Comparison of endogenously biotinylated proteins to those

32 **biotinylated by BirA\*-expressing neurons.** (a) DIV 14 hippocampal neurons treated with 50  
33  $\mu\text{M}$  biotin for 24 hrs labeled using streptavidin (green) or antibodies against  $\beta 4$  spectrin (blue)  
34 or HA (red). HA detects the BirA\* ligase in neurons transduced using an adenovirus to express  
35 HA-BioID. Scalebar = 10  $\mu\text{m}$ . (b) The number of peptide spectral matches (PSMs) for each  
36 biotinylated protein identified by mass spectrometry. The solid line is the least-squares fit of  
37 the biotinylated proteins while the dotted lines parallel to the least-squares fit line represent an  
38 arbitrary minimum of 10 PSMs confidence interval. Endogenously biotinylated carboxylases are  
39 highlighted in the red region of the graph, while tubulins and actin are highly biotinylated in  
40 BirA\*-expressing neurons. For clarity, not all gene names are shown on the graph. N= 1 for  
41 BirA\* transfected neurons and for untreated neurons.  
42

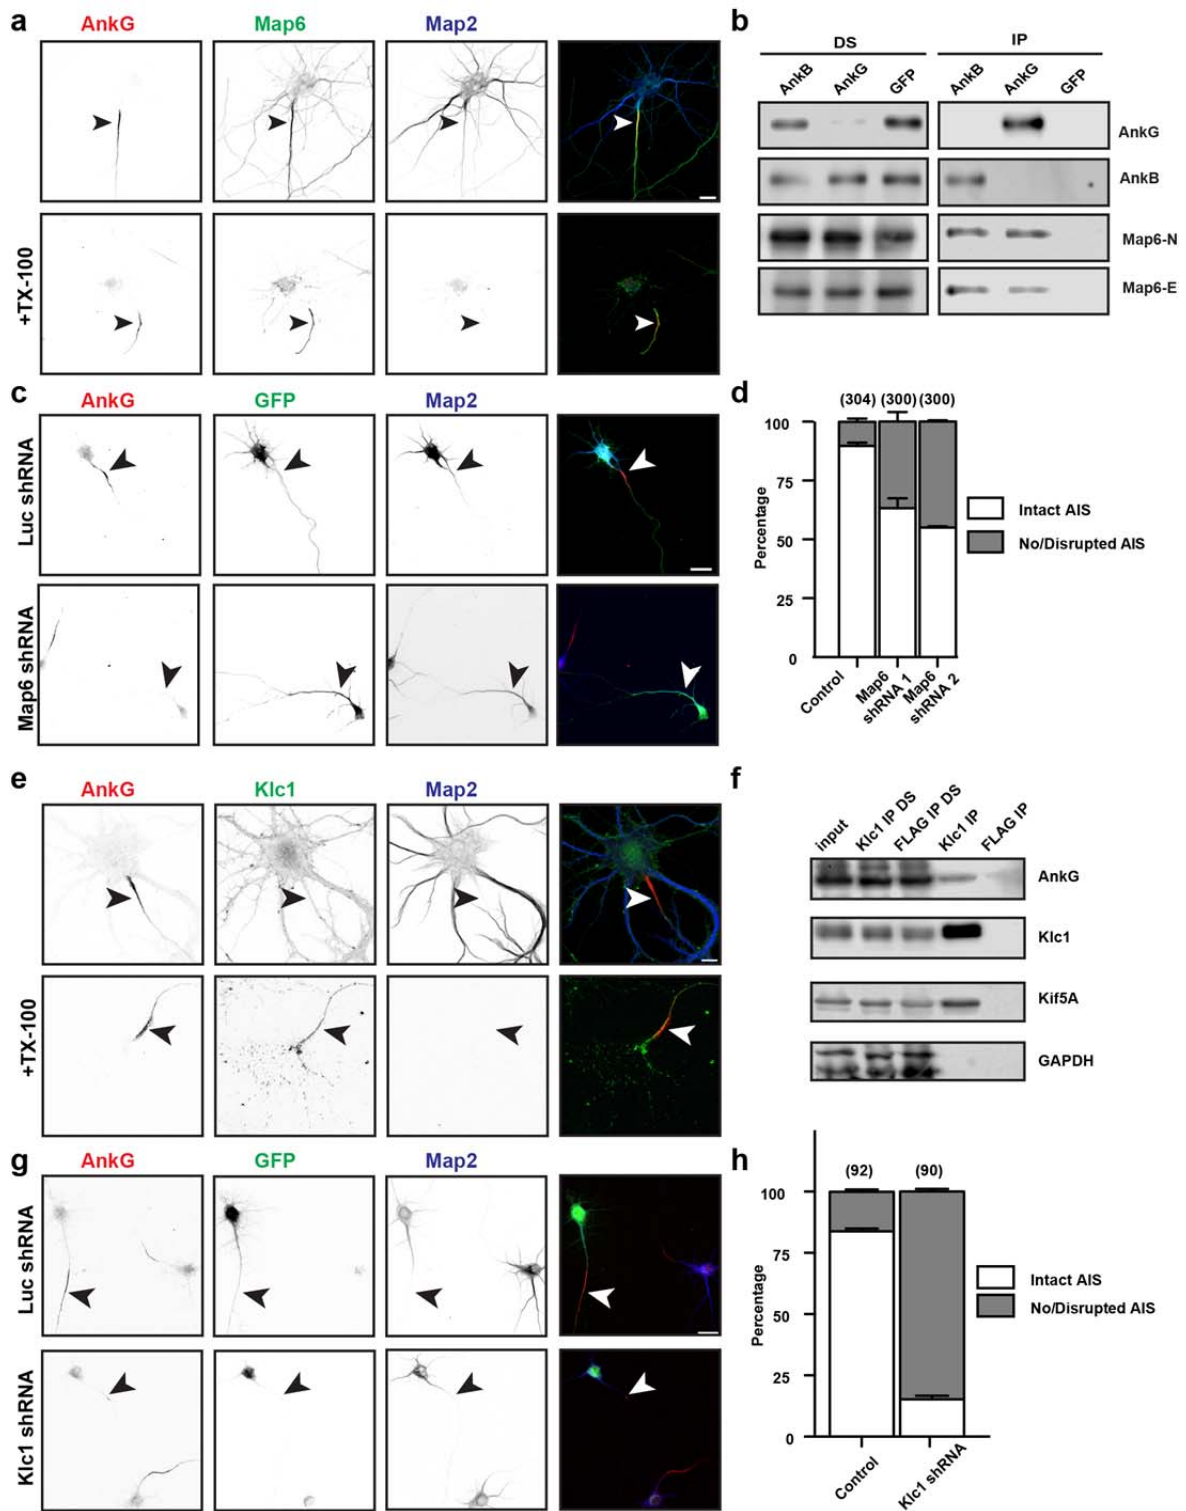

43

44

45

**Supplementary Figure 4. Map6 and Klc1 are AIS proteins.** (a) Immunostaining of DIV14 cultured hippocampal neurons using antibodies against AnkG (red), Map6 (green), and Map2

46 (blue). The lower panels show the Triton X-100 detergent resistant pool of Map6 at the AIS.  
47 AIS are indicated by arrowheads. Scalebar = 10  $\mu$ m. (b) AnkG and AnkB can co-  
48 immunoprecipitate Map6 from brain homogenate. IP = immunoprecipitation, DS= depleted  
49 supernatant. (c) Immunostaining of DIV6 hippocampal neurons, transfected at DIV2 with  
50 control (Luciferase (Luc)) and Map6 shRNAs, using antibodies against AnkG (red), GFP (green),  
51 and Map2 (blue). AIS and proximal axons are indicated by arrowheads. Scalebar = 20  $\mu$ m. (d)  
52 Quantification of the percentage of neurons with normal or no/disrupted AIS as indicated by  
53 AnkG immunostaining. Error bars,  $\pm$ SEM. N=3 independent experiments; the number of  
54 neurons counted is shown. (e) Immunostaining of DIV14 cultured hippocampal neurons using  
55 antibodies against AnkG (red), Klc1 (green), and Map2 (blue). The lower panels show the Triton  
56 X-100 detergent resistant pool of Klc1 at the AIS. AIS are indicated by arrowheads. Scalebar =  
57 10  $\mu$ m. (f) Klc1 can co-immunoprecipitate AnkG and Kif5A from brain homogenate. FLAG  
58 antibodies were used as a control. IP = immunoprecipitation, DS= depleted supernatant. (g)  
59 Immunostaining of DIV6 hippocampal neurons, transfected at DIV2 with control Luc shRNA and  
60 Klc1 shRNAs, using antibodies against AnkG (red), GFP (green), and Map2 (blue). AIS and  
61 proximal axons are indicated by arrowheads. Scalebar = 20  $\mu$ m. (h) Quantification of the  
62 percentage of neurons with normal, disrupted, or no AIS as indicated by AnkG immunostaining.  
63 Error bars,  $\pm$ SEM. N=3 independent experiments; the number of neurons counted is shown. All  
64 molecular weight markers are in kilodaltons. Source data are provided as a Source Data file.  
65



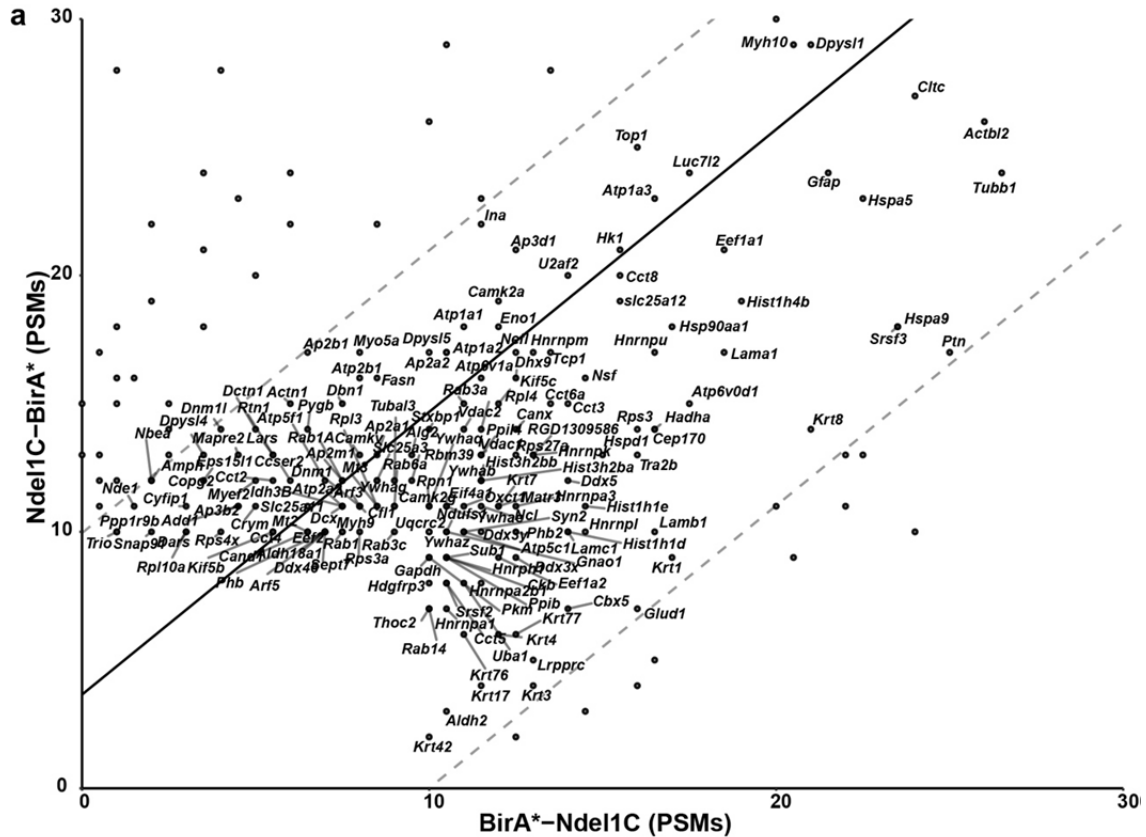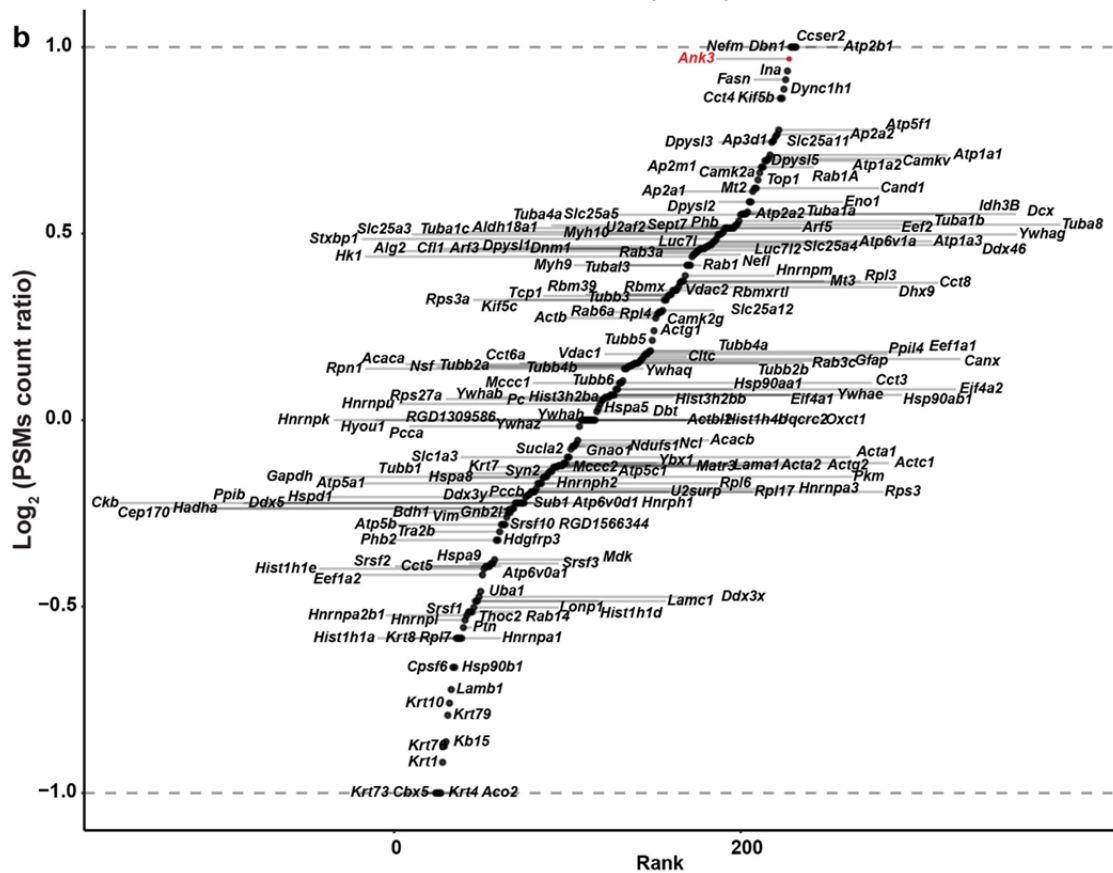

66 Supplementary Figure 5. Proteins biotinylated equivalently by both Ndel1C-BirA\* and BirA\*.

67 **Ndel1C.** (a) The PSMs for each protein biotinylated by Ndel1C-BirA\* and BirA\*-Ndel1C, and  
68 identified by mass spectrometry. A cutoff of 10 PSMs was used. (b) Rank plot showing the ratio  
69 of PSMs for a given protein in the Ndel1C-BirA\* samples and the BirA\*-Ndel1C samples, i.e.  
70  $\text{Log}_2(\text{Ndel1C-BirA}^* \text{ PSMs}/\text{BirA}^*\text{-Ndel1C PSMs})$ . Known AIS proteins are shown in red. In (a) and  
71 (b), N= 1 for each condition.

72

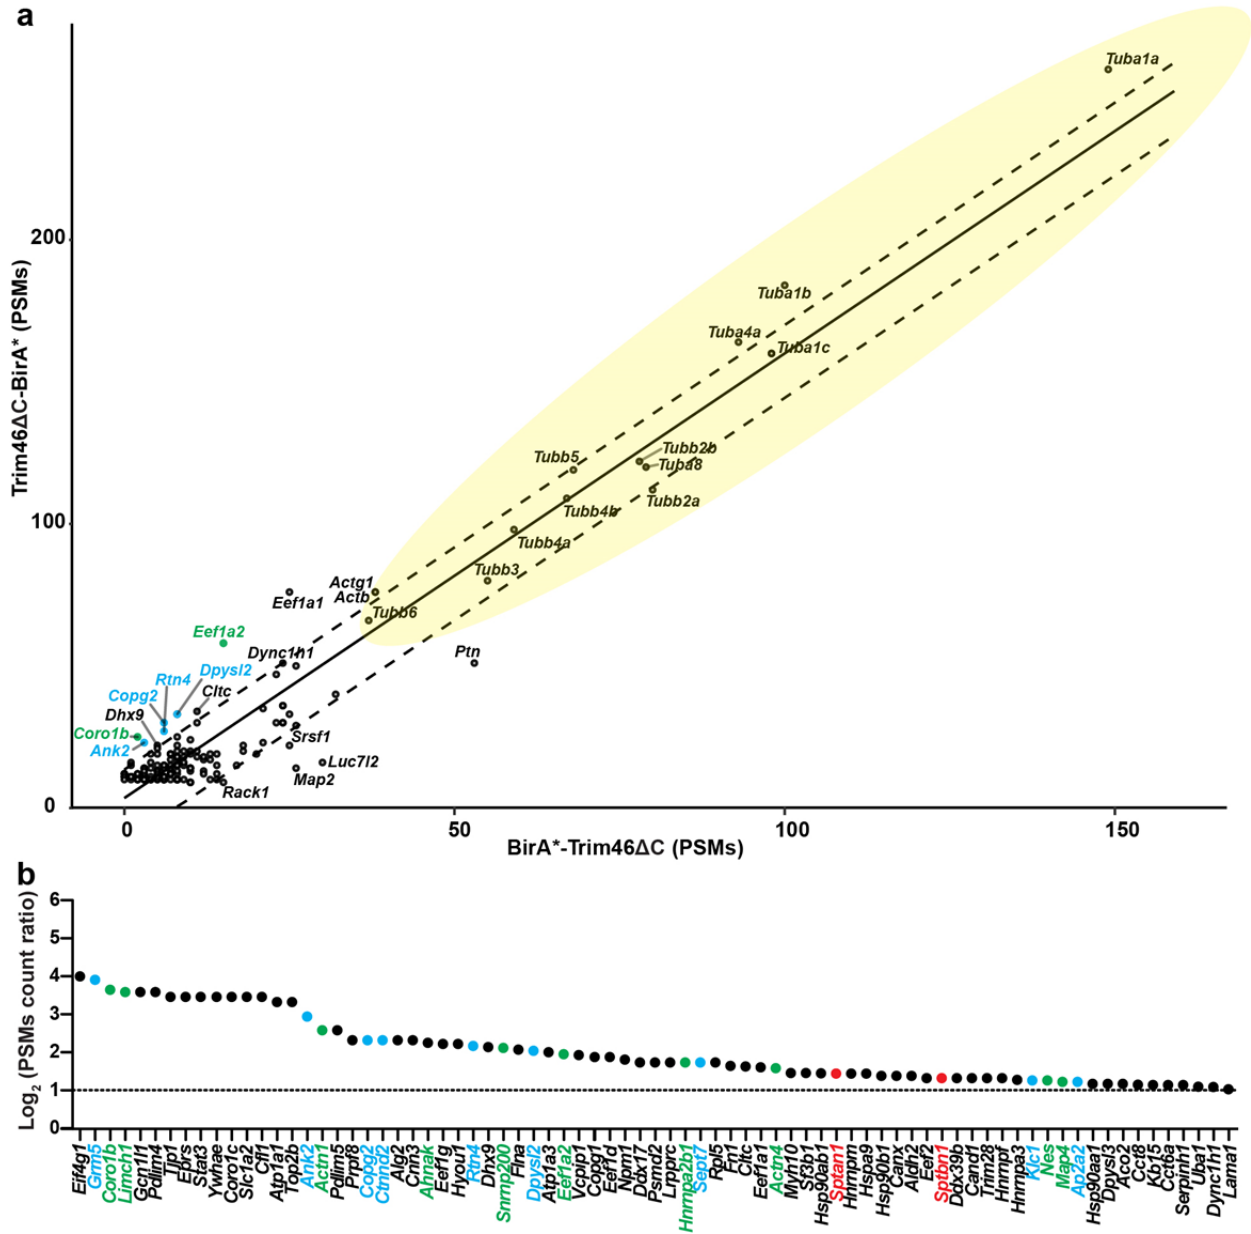

73

74

75

76

77

78

79

80

81

82

83

**Supplementary Figure 6. Proximity biotinylation using Trim46 chimeras.** (a) The number of peptide spectral matches (PSMs) for each biotinylated protein identified by mass spectrometry. The solid line is the least-squares fit of the biotinylated proteins while the dotted lines parallel to the least-squares fit line represent an arbitrary minimum of 10 PSMs confidence interval. Endogenously biotinylated carboxylases have been removed, while tubulins and actin are highly biotinylated in both Trim46ΔC-BirA\* and BirA\*-Trim46ΔC -expressing neurons. For clarity and presentation, not all gene names are shown on the graph. (b) The ratio (Log<sub>2</sub>) of PSMs Trim46ΔC-BirA\* and BirA\*-Trim46ΔC -expressing neurons. Known AIS proteins are shown in red. Proteins also identified using NF186-BirA\* chimeras are shown in blue, while proteins also

84 identified using Ndel1C-BirA\* chimeras are shown in green. The dashed line indicates two-fold  
85 enrichment, or equal levels of biotinylation. N=1 independent experiment.

86

87

88

89 **Supplementary Methods**

90

91 *Primers used in this study.*

92

93 The pENTR11 shuttle vector was modified by adding the human neuron specific enolase  
94 promoter (hENO2) from Addgene (Plasmid #11606). The hENO2 promoter was amplified by  
95 PCR and inserted into pENTR11 and named pENTR11-hENO2-MCS.

96 F-hEno2

97 GCTAGCGTATGCAGCTGGACCTAGGAGAGAAGCAG

98 R-hEno2

99 AGATCTCGGTGGTAGTGGCGGTGGCGGTGGCGGTGG

100 BirA\* was amplified by PCR from pcDNA3.1 Myc-BirA(R118G)-MCS (Addgene, Plasmid  
101 #35700) to generate a shuttle template named pENTR11-hENO2-MCS-BirA\*-MCS.

102 F-BirA

103 GTCGACATGGAACAAAACTCATCTCAGAAGAG

104 R-BirA

105 GCGGCCGCTTCTCTGCGCTTCTCAGGG

106 To generate pENTR11-hENO2-HA-NF186-Myc-BirA\* and pENTR11-hENO2-HA-  
107 NF186ΔFIGQY-Myc-BirA\*, cDNA encoding HA-NF186 and NF186ΔFIGQY were amplified by PCR  
108 from Rat NF186 tagged with an N-terminal HA epitope tag 53

109 F-NF186

110 5'- TTAA CTCGAG GC CAG GCA GCA GGC GCC A -3'

111 R-NF186

112 5'- TGAC AAGCTT GG CCA GGG AAT AGA TGG CA -3'

113 R-NF186deltaFIGQY

114 5'- TTGC AAGCTT GC CCA AGG GGA CAT CCT T -3'

115 pENTR11-hENO2-Nde1C-Myc-BirA\* and pENTR11-hENO2-Myc-BirA\*-Nde1C were

116 generated by amplifying Nde1C (Origene) and inserting it into shuttle template pENTR11-

117 hENO2-MCS-BirA\*-MCS. pENTR11-hENO2-Trim46ΔC -Myc-BirA\* and pENTR11-hENO2-Myc-

118 BirA\*- Trim46ΔC were generated by amplifying Trim46 (Origene) and inserting it into shuttle

119 template pENTR11-hENO2-MCS-BirA\*-MCS

120 F-Nde1

121 GCGATCGCCATGGATGGTGAAGATA

122 R-Nde1

123 ATGTCGAGCGGCCGCGTACGCGTCACACTG

124 F-Trim46

125 5'- GTAC CTCGAG AA GAA CAT GGA GAA GGA ACT GCT G -3'

126 R-Trim46

127 5'- TTAA AGATCT TG ACG GGC GCC TCG GGC ACT -3'

128
