# Supplementary material for: Mapping axon initial segment structure and function by multiplexed proximity biotinylation
Source: PubMed Central journal article supplement (PMC6941957; doi:10.1038/s41467-019-13658-5), 2020-01-03
Supplement: 41467_2019_13658_MOESM2_ESM.pdf [file 41467_2019_13658_MOESM2_ESM.pdf]

### **Description of Additional Supplementary Files**

File Name: Supplementary Data 1

Description: This excel file contains all peptide spectral mass counts in the experiments reported here.
